1 Modelling eDNA transport in river networks reveals highly  
2 resolved spatio-temporal patterns of freshwater biodiversity

3 Luca Carraro<sup>1,2,\*</sup>, Rosetta C. Blackman<sup>1,2</sup>, Florian Altermatt<sup>1,2</sup>

4 <sup>1</sup> *Department of Evolutionary Biology and Environmental Studies, University of Zurich, Zürich, Switzerland*

5 <sup>2</sup> *Department of Aquatic Ecology, Swiss Federal Institute of Aquatic Science and Technology, Eawag, Dübendorf,*  
6 *Switzerland*

7 \* *Corresponding author: [luca.carraro@eawag.ch](mailto:luca.carraro@eawag.ch)*

## 8 Abstract

- 9 1. The ever-increasing threats to riverine biodiversity call for the development of novel approaches for a  
10 complete assessment of biodiversity across highly resolved spatial, temporal and taxonomic scales.  
11 Past studies on riverine biodiversity patterns were often restricted to spatially scattered data, focused  
12 on specific taxonomic groups, and disregarded the temporal dimension, preventing a universal  
13 understanding of relationships between biodiversity and stream size across spatial, temporal and  
14 taxonomic scales. Recent advances in the joint use of environmental DNA (eDNA) data and novel  
15 mechanistic models for eDNA transport in river networks have the potential to uncover the full  
16 structure of riverine biodiversity at an unprecedented spatial resolution, hence providing fundamental  
17 insights into ecosystem processes and offering a basis for targeted conservation measures.
- 18 2. Here, we applied a mechanistic model (i.e., the eDITH model) to a metabarcoding dataset covering  
19 three taxonomic groups (fish, invertebrates and bacteria) and three seasons (spring, summer and  
20 autumn) for a 740-km<sup>2</sup> Swiss catchment, sampled for eDNA at 73 sites.
- 21 3. Using the mechanistic model, we upscaled eDNA-based biodiversity predictions to more than 1900  
22 individual reaches, allowing an assessment of patterns of  $\alpha$ - and  $\beta$ -diversity across seasons and  
23 taxonomic groups at a space-filling, fine scale over the whole network.
- 24 4. We found that both predicted  $\alpha$ - and  $\beta$ -diversity varied considerably depending on both season and  
25 taxonomic group. Predicted fish  $\alpha$ -diversity increased in the downstream direction at all seasons,  
26 while invertebrate and bacteria  $\alpha$ -diversity either decreased downstream or was not significantly  
27 related to position within network, depending on the season. Spatial  $\beta$ -diversity was mostly found  
28 to be decreasing in the downstream direction, and this was the case for all seasons for bacteria.  
29 Temporal  $\beta$ -diversity was mostly found to be increasing downstream. In general, genus richness  
30 values predicted by the model were found to be higher than those obtained by directly analyzing  
31 the eDNA data. Overall, stream size (subsumed by drainage area) was generally a poor predictor of  
32 patterns of predicted  $\alpha$ - and  $\beta$ -diversities. Conversely, riverine biodiversity is shaped by a complex  
33 interplay of environmental variables, abiotic and biotic factors, which need be taken into account for  
34 a correct assessment of its structure.

35 **Keywords:** eDITH model | aquatic biodiversity | environmental DNA | alpha diversity | beta diversity

## 36 1 Introduction

37 Freshwater ecosystems are among the most biodiverse ecosystems worldwide, in relation to their area  
38 [Dudgeon, 2020; Vörösmarty et al., 2010], but also among the most threatened with respect to loss of  
39 biodiversity [Darwall et al., 2018; Reid et al., 2019]. Strategies for conservation of biodiversity should be  
40 based on complete biodiversity assessments across spatial and temporal scales, as well as taxonomic groups  
41 in order to fully understand and preserve ecosystem functioning [Altermatt et al., 2020]. However, this is  
42 often not the case for river systems, due to the spatial structure of riverine metacommunities, the coarse  
43 spatio-temporal resolution of biodiversity data, a limited taxonomic coverage, and the difficulty to transfer  
44 knowledge from one taxonomic group to another [Barbour, 1999; Altermatt, 2013; Altermatt et al., 2020;  
45 Darwall et al., 2011].

46 A seminal model for ecological communities in rivers, the river continuum concept [Vannote et al., 1980],  
47 predicted species diversity to have a unimodal patterns in very large rivers (up to 12<sup>th</sup> Strahler order), with  
48 the highest richness observed in mid-order reaches. For most rivers of intermediate size, this translates into  
49 an increasing pattern of  $\alpha$ -diversity in the downstream direction, which has been validated empirically  
50 [Ward, 1998], in particular for fish [Muneepeerakul et al., 2008] and macroinvertebrates [Altermatt et al.,  
51 2013; Tonkin et al., 2015; Blackman et al., 2021b]. Conversely, bacteria richness was generally found to  
52 follow a decreasing trend in the downstream direction [Besemer et al., 2013; Ruiz-González et al., 2015;  
53 Savio et al., 2015]. The other component of total ( $\gamma$ -) diversity, namely  $\beta$ -diversity, has been less often  
54 investigated, although Finn et al. [2011] observed decreasing  $\beta$ -diversity with increasing stream size in  
55 macroinvertebrates. However, universal relationships between biodiversity and stream size appear to be  
56 elusive [Vander Vorste et al., 2017]. Crucially, most of the studies investigating biodiversity patterns in rivers  
57 only focused on specific taxonomic groups, or neglected the temporal dimension of biodiversity, either  
58 by considering a snapshot of data collected at a single time point, or by analyzing temporally averaged  
59 data. Moreover, most biodiversity studies have been based on spatially scattered, pointwise data, hence  
60 preventing a spatially highly resolved and/or space filling assessment of biodiversity.

61 In this perspective, environmental DNA (eDNA, i.e. DNA isolated from environmental samples [Taberlet  
62 et al., 2012; Pawlowski et al., 2020]) has opened new avenues for fast, cost-effective and taxonomically  
63 broad biodiversity assessments [Thomsen and Willerslev, 2015; Valentini et al., 2016; Deiner et al., 2017;  
64 Beng and Corlett, 2020]. In particular, eDNA increases our understanding of biodiversity structure and  
65 related ecosystem processes in riverine ecosystems [Altermatt et al., 2020], especially considering that,  
66 due to downstream transportation of DNA molecules with streamflow, eDNA constitutes an aggregated  
67 measure of biodiversity across large drainage areas [Deiner and Altermatt, 2014; Barnes and Turner,  
68 2015; Deiner et al., 2016; Shogren et al., 2017; Seymour et al., 2021]. Correct interpretation of eDNA data  
69 collected in rivers hence requires consideration of the role of hydrological transport and decay of genetic

70 material. The recently developed eDITH model (*eDNA Integrating Transport and Hydrology*) couples a  
71 geomorphological and hydrological characterization of a catchment, eDNA transport and decay dynamics,  
72 and a species distribution model, and allows transforming pointwise eDNA data collected at a catchment  
73 into predicted maps of taxon density [Carraro et al., 2017, 2018, 2020b, 2021]. The eDITH model has hitherto  
74 been successfully applied to predict the distribution of single species, i.e. a fish parasite and its primary  
75 host [Carraro et al., 2017, 2018], as well as biodiversity of aquatic insects at a given point in time [Carraro  
76 et al., 2020b]. Given its generality and the basic assumptions on eDNA shedding and decay processes  
77 underpinning its formulation [Carraro et al., 2018], the eDITH model can in principle be applied to any  
78 taxonomic group, and can also be used to identify temporal variations in biodiversity patterns in river  
79 networks.

80 Here, we applied the eDITH model to an eDNA metabarcoding dataset covering three taxonomic groups  
81 relevant to freshwater communities (fish, invertebrates and bacteria), and three seasons (spring, summer  
82 and autumn), providing predictions of patterns of  $\alpha$ - and  $\beta$ -diversity, and changes thereof with respect to  
83 season and taxonomic groups, at an unprecedented space-filling, highly resolved spatial scale ( $\sim$ 500-m  
84 long river reaches) covering a 740-km<sup>2</sup> Swiss catchment [Blackman et al., 2021a].

## 85 2 Methods

### 86 2.1 Study area

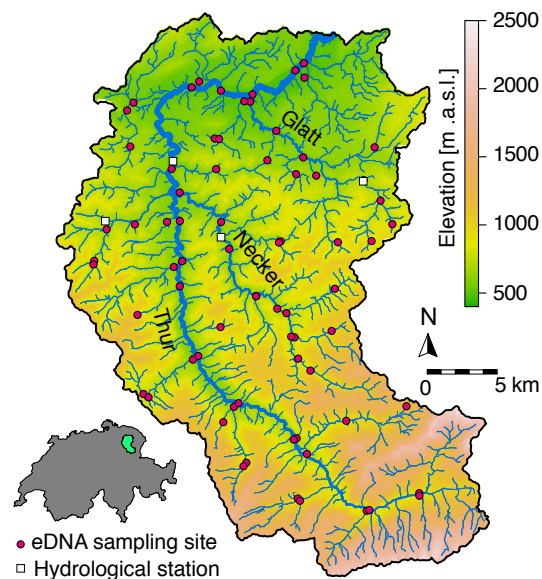

**Figure 1:** Map of the Thur catchment displaying the locations of eDNA sampling sites (red dots) and hydrological stations (white squares). The three main tributaries (rivers Thur, Glatt and Necker) are also identified.

87 The Thur (Fig. 1) is a pre-alpine river located in northeastern Switzerland, draining an area of 740 km<sup>2</sup>,  
88 for which extensive data on hydrology and biodiversity are available [Abbaspour et al., 2007; Mächler et al.,  
89 2019; Carraro et al., 2020b; Blackman et al., 2021a]. Here, eDNA samples were collected at 73 sites in three  
90 different seasons in 2018: spring (17<sup>th</sup>-24<sup>th</sup> May), summer (20<sup>th</sup> Aug-5<sup>th</sup> Sep), and autumn (2<sup>nd</sup>-8<sup>th</sup> Oct). In  
91 summer, 4 sites were not sampled because their respective reaches were temporarily dry. Hydrological data  
92 on the catchment were available at four gauging stations (Fig. 1) operated by the Swiss Federal Office for  
93 the Environment, while landscape data on elevation, land cover types and geology were provided by the  
94 Swiss Federal Office for Topography (see Carraro et al. [2020b] for details).

95 The river network was extracted by using a TauDEM implementation of the D8 method [O'Callaghan  
96 and Mark, 1984] on a 25-m digital elevation model of the region. A threshold drainage area of 0.25 km<sup>2</sup>  
97 was used to identify the sources of the river network, resulting in a total river length of 1034 km. Such  
98 threshold area value was chosen as the maximum one such that all 73 sampling sites effectively belonged to  
99 the resulting river network. The river was partitioned into reaches of maximum length 1 km, by following  
100 Carraro et al. [2020a], which resulted in a total of 1908 reaches, with mean length 542 m.

## 101 **2.2 eDNA data collection and sequencing**

102 Details on eDNA data collection and sequencing are elucidated in Blackman et al. [2021a], but are here  
103 briefly recapitulated in order for this work to be self contained.

104 Environmental DNA samples were collected and filtered on site using disposable 50 mL syringes and  
105 0.22  $\mu$ m sterivex filters (Merck Millipore, Merck KgaA, Darmstadt, Germany). At each site 1 L of water  
106 was filtered. Samples were extracted in clean lab facilities using the DNeasy PowerWater Sterivex Kit  
107 (Qiagen, Hilden, Germany) following the manufacturer's protocol. Three libraries were constructed for  
108 the following markers: 12S, COI and 16S using a two-step (12S and COI) and three-step (16S) library  
109 preparation method, where clean amplicons were indexed using unique combinations of the Illumina  
110 Nextera XT Index Kit A, C and D in the last PCR, following the manufacturer's protocol (Illumina, Inc.,  
111 San Diego, CA, USA). Paired-end sequencing was performed on an Illumina MiSeq (Illumina, Inc. San  
112 Diego, CA, USA) at the Genetic Diversity Centre at ETH, Zurich (see Blackman et al. [2021a] for full details  
113 of each library preparation). After each of the libraries were sequenced, the data was demultiplexed and  
114 reads were quality checked. Raw reads were end-trimmed, merged and quality filtered, additional reads  
115 were clustered at 99% identity to obtain error corrected and chimera-filtered sequence variants ZOTUs.  
116 The final ZOTUs were then clustered using a 97% similarity approach and taxonomic assignment with a  
117 0.85 confidence threshold. Taxonomic assignment was carried out with the following databases: 12S: NCBI  
118 BLAST (v200416), COI: Custom reference database (Including MIDORI un-trimmed (V20180221) and 16S:  
119 SILVA (V128). Prior to data analysis a 0.1% contamination threshold was applied to each sample, species

120 with a non-aquatic life stage were removed from the data set and the data was merged at genus level.

121 Overall, we detected 12 fish, 80 invertebrate and 282 bacterial genera. The three fish genera *Barbus*, *Gobio*  
122 and *Phoxinus* were detected with both the 12S and COI barcode regions. To avoid duplicated coverage, we  
123 removed from the database the read numbers corresponding to these three genera from the COI library, as  
124 the corresponding read numbers in the 12S library were higher and the latter marker region was used to  
125 target fish. Fig. S1 displays the total number of reads observed and the total number of genera detected for  
126 each barcode region, taxonomic group and season, pooled over all sampling sites.

### 127 2.3 eDITH model

128 The eDITH model implementation essentially follows Carraro et al. [2020b], and is here summarized for  
129 the specific study setting. For each genus the expected eDNA concentration  $C_j$  at a sampling site  $j$  of the  
130 network reads:

$$131 \quad C_j = \frac{1}{Q_j} \sum_{i \in \gamma(j)} p_i A_{S,i} \exp\left(-\frac{L_{ij}}{\bar{v}_{ij}\tau}\right), \quad (1)$$

132 where  $Q_j$  is the water discharge at reach  $j$  (i.e., the reach where sampling site  $j$  is located),  $\gamma(j)$  identifies  
133 the set of reaches upstream of  $j$  (with  $j$  included),  $p_i$  the eDNA production rate at reach  $i$ ,  $A_{S,i}$  the source  
134 area of reach  $i$  (namely its open water surface),  $L_{ij}$  the along-stream path from  $i$  to  $j$ ,  $\bar{v}_{ij}$  the average water  
135 velocity along such path,  $\tau$  a characteristic decay time. eDNA production rates are expressed via a Poisson  
136 generalized linear model as  $p_i = p_0 \exp(\beta^T \mathbf{X}(i))$ , where  $\mathbf{X}(i)$  is a vector of environmental covariates,  $\beta$   
137 a vector of covariate effects and  $p_0$  a baseline production rate. We utilized 35 covariates, representing  
138 morphological, land cover, geological and geographical characteristics of the catchment. These covariates  
139 correspond exactly to those used in Carraro et al. [2020b]. Observed read data from each genus at a given  
140 site  $j$  and a given season were assumed to follow a geometric distribution, with mean proportional to  $C_j$ .

141 Following Carraro et al. [2020b], reach width was evaluated via aerial images in correspondence to  
142 the four hydrological stations, and a power-law relationship with drainage area was derived. Width  
143 values were then extrapolated to all 1908 reaches via the so-obtained power-law relationship. The same  
144 procedure was performed for the three different seasons for discharge and water depth, whose data values  
145 were taken as the averages of the mean daily measured values at the hydrological stations during the  
146 respective sampling periods. A power-law relationship on drainage area was then fitted separately for  
147 each hydrological variable (i.e., discharge, water depth) and season, and then extrapolated to the whole  
148 catchment. Finally, we calculated water velocity values at all reaches for all seasons under the hypothesis of  
149 rectangular river cross-sections (i.e.,  $v = Q/(wd)$ , where  $v$  is velocity,  $Q$  is discharge,  $w$  is width and  $d$  is  
150 depth).

151 The posterior distributions of the 37 unknown parameters (i.e., vector  $\beta$  containing effect sizes for 35

152 covariates, decay time  $\tau$  and baseline production rate  $p_0$ ) were inferred independently for each season and  
153 genus, by using the DREAM<sub>ZS</sub> [Vrugt et al., 2009] algorithm, implemented via the *BayesianTools* R-package  
154 [Hartig et al., 2019]. Three independent Markov chains were run, with a total chain length of  $3 \cdot 10^6$  (plus  
155 a burn-in length of  $5 \cdot 10^5$ ). A normal prior distribution with null mean and standard deviation of 3 was  
156 adopted for all  $\beta$  components;  $p_0$  had a uniform prior bound between 0 and 1; a log-normal prior for  $\tau$  was  
157 chosen, with a median of 5 h and a mode of 4 h. The so-obtained maximum a posteriori parameter estimates  
158 were used to produce maps of relative species density (i.e.,  $p_i$ ). These were subsequently translated into  
159 detection probability maps by evaluating the expected read number that would be observed at a reach if  
160 the reach were disconnected from the river network, and by assessing the probability that the measured  
161 read number therein would be larger than 0 according to the assumption of geometric distribution of  
162 read numbers (see Carraro et al. [2020b] for details). Finally, presence/absence maps for each genus were  
163 derived by imposing a threshold of 0.5 on detection probability.

## 164 2.4 Evaluation of $\alpha$ - and $\beta$ -diversity patterns

165 For each taxonomic group and season, the number of genera predicted by the eDITH model to be present  
166 in each of the 1908 reaches was taken as a measure of  $\alpha$ -diversity. We then performed a linear regression to  
167 assess the effect of drainage area on genus richness. Given that values of genus richness at the different  
168 reaches are in principle not independent (i.e., due to the spatial structure of the covariates used to predict  
169 the taxon patterns, predicted  $\alpha$ -richness values for nearby reaches tend to be correlated), we refrained from  
170 performing classic statistical tests on the slope of the linear regression. Instead, we assessed the significance  
171 of the effect of drainage area via a bootstrapping approach: we subsampled 500 out of 1908 reaches in a  
172 quasi-random fashion (i.e., by splitting reaches into 10 bins according to the drainage area deciles, and  
173 randomly sampling (with replacement) 50 reaches within each bin), and linearly regressed genus richness  
174 on drainage area for the subsampled reaches. We repeated this procedure 100 times, and considered a  
175 positive (respectively negative) significant effect of drainage area if, in at least 95 out of 100 cases, the fitted  
176 slope of the linear regression was positive (respectively negative). The 2.5<sup>th</sup>-97.5<sup>th</sup> percentile range of the  
177 so-obtained 100 linear regression lines was used as confidence interval of the linear model fit. Moreover,  
178 we also computed genus richness from the raw eDNA data at the 73 sampling sites across seasons and  
179 taxonomic groups.

180 In order to evaluate spatial patterns of  $\beta$ -diversity with respect to each taxonomic group, the 1908  
181 reaches were partitioned into two location groups, i.e. upstream, if their drainage area was lower than  
182 the median value across all reaches, or downstream, otherwise. Within each location group, we picked  
183 pairs of flow-unconnected sites such that each site appeared in only one pair; the choice of pairs was  
184 operated randomly, and was stopped when no other pair could be formed from the sites that had not been

**Table 1:** Summary of the effect of drainage area (i.e. position within network) on  $\alpha$ - and  $\beta$ -diversity patterns. ↗: increasing in the downstream direction; ↘: decreasing in the downstream direction; →: invariant relationship; \*: significant relationship; <sup>NS</sup>: non-significant relationship. Approaches to detect significance are detailed in the Methods.

|               | $\alpha$ diversity |        |                 | Spatial $\beta$ diversity |        |        | Temporal $\beta$ diversity |                 |
|---------------|--------------------|--------|-----------------|---------------------------|--------|--------|----------------------------|-----------------|
|               | spring             | summer | autumn          | spring                    | summer | autumn | spr.-sum.                  | spr.-aut.       |
| Fish          | ↗*                 | ↗*     | ↗*              | →                         | ↘*     | ↗*     | ↗*                         | ↗*              |
| Invertebrates | ↘*                 | ↘*     | ↗ <sup>NS</sup> | →                         | →      | ↘*     | ↗*                         | ↗*              |
| Bacteria      | ↗ <sup>NS</sup>    | ↘*     | ↗ <sup>NS</sup> | ↘*                        | ↘*     | ↘*     | ↗*                         | ↗ <sup>NS</sup> |

185 picked yet. Note that we chose to limit our attention to  $\beta$ -diversity of flow-unconnected sites in order to  
 186 correct for the fact that downstream sites are more likely to be connected by flow than upstream sites (and  
 187 hence inherently more prone to show similar community compositions), since the latter mostly consist  
 188 of headwater reaches. Moreover, picking each site only once ensures that measures of  $\beta$ -diversity among  
 189 all pairs are mutually independent. For each so-obtained pair, Jaccard distance was evaluated via the  
 190 *betapart* R-package [Baselga and Orme, 2012], which also allowed partitioning of nestedness and turnover  
 191 components of total  $\beta$ -diversity. We accounted for the stochasticity in the choice of pairs by repeating  
 192 the pair selection process 100 times. The effect of location was deemed significant if the equal-tailed 95%  
 193 confidence interval of the mean Jaccard distance across one location group did not overlap with that of the  
 194 other group. Given the relatively limited number (73) of sampling sites available, we found it unfeasible to  
 195 repeat the aforementioned procedure to evaluate spatial  $\beta$ -diversity patterns for the raw eDNA data.

196 Finally, temporal patterns of  $\beta$ -diversity were evaluated by comparing, within each taxonomic group,  
 197 predicted presence/absence for all taxa at different seasons via the Jaccard distance evaluated at every reach.  
 198 In particular, we treated the spring season as a benchmark and focused on patterns of spring-to-summer  
 199 and spring-to-autumn temporal  $\beta$ -diversity. We then linearly regressed these patterns against drainage  
 200 area to possibly detect an upstream/downstream gradient on temporal  $\beta$ -diversity. In order to assess the  
 201 significance of such trends, we adopted the same bootstrapping procedure that was earlier described with  
 202 respect to  $\alpha$ -diversity. Moreover, we computed temporal  $\beta$ -diversity (expressed as Jaccard distance) for the  
 203 raw eDNA data across seasons and taxonomic groups.

## 204 3 Results

### 205 3.1 $\alpha$ -diversity patterns

206 Overall, patterns of  $\alpha$ -diversity across the different taxonomic groups and seasons show weak, and often  
 207 non-significant relationships with drainage area (Table 1, Fig. 2). Indeed, the proportion of variance  
 208 in  $\alpha$ -diversity explained by drainage area is in all cases lower than 4%, with the exception of fish in



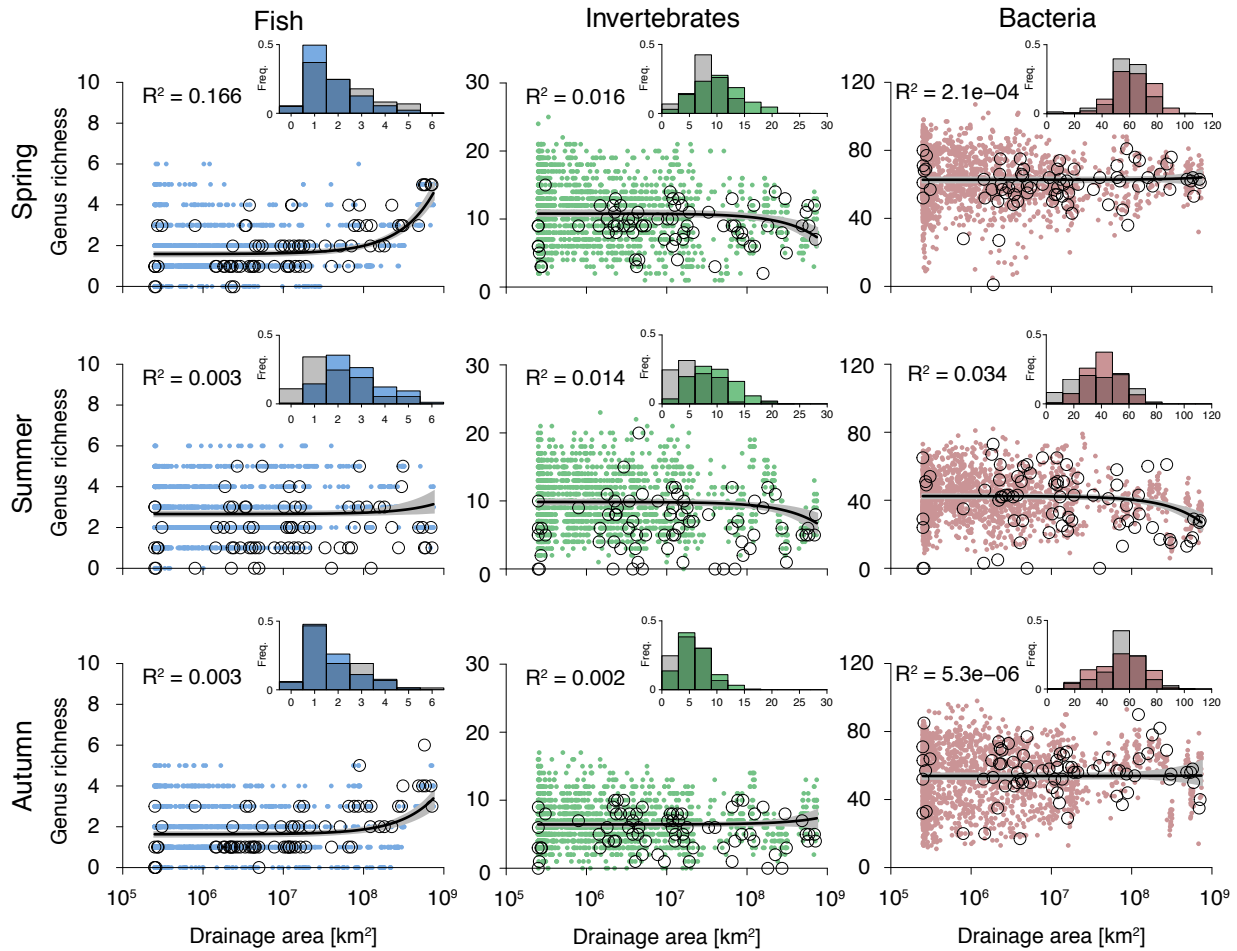

**Figure 2:** Patterns of  $\alpha$ -diversity as a function of drainage area. Colored, closed dots represent eDITH model results; for comparison, values inferred from eDNA data are displayed with black, open dots. Black solid lines represent linear model fits on modelled genus richness ( $R^2$  values are reported on the top-left corner). Shaded areas represent 95% confidence intervals on linear model fit (obtained via a bootstrapping technique detailed in the Methods). Note that linear models were fitted on natural values on drainage area, hence the trend lines are exponential in these semi-logarithmic plots. Inset: frequency distribution of genus richness values as predicted by eDITH (colored bars) vs. inferred from eDNA data (grey bars).

209 spring, where drainage area explains 16.6% of the variance in  $\alpha$ -diversity (Fig. 2). Conversely, patterns of  
 210  $\alpha$ -diversity appear to be driven by clusters of neighbouring reaches (Fig. 3), which is reflected by the role of  
 211 environmental covariates in explaining the spatial patterns of taxa (see Fig. S2 for a summary of significant  
 212 covariates depending on taxonomic groups and seasons). In general, genus richness values predicted by the  
 213 eDITH model are higher than those obtained by directly analyzing the eDNA data (Fig. 2, insets) especially  
 214 for invertebrates (irrespective of the season), and in summer also for fish and bacteria. Moreover, for fish  
 215 and invertebrates and irrespective of the season, the eDITH model predicts higher  $\alpha$ -diversity with respect  
 216 to the raw data for low drainage areas (Fig. 2).

217 Predicted fish  $\alpha$ -diversity is significantly correlated with drainage area at all seasons (Table 1, Fig. 2).

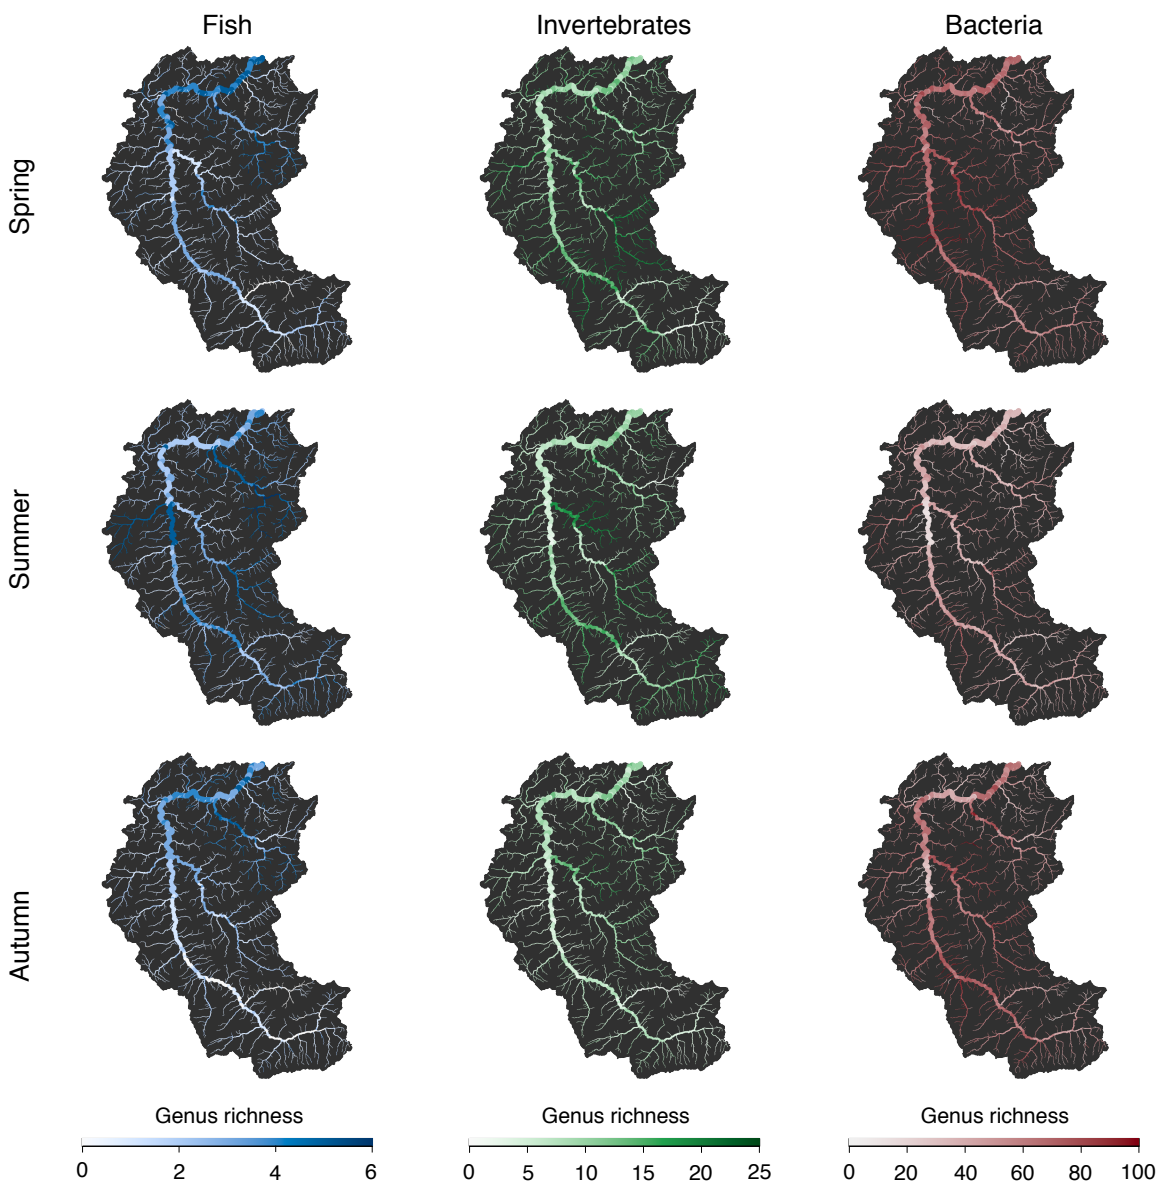

**Figure 3:** Spatial patterns of predicted  $\alpha$ -diversity (expressed in terms of genus richness) for the different taxonomic groups and seasons. Displayed values correspond to colored, closed dots in Fig. 2.

218 While fish genus richness in spring and autumn is mostly concentrated in the downstream reaches of the  
219 watershed, richness in summer is highest at small tributaries at intermediate distance from the river outlet  
220 (Fig. 3). For invertebrates, the trend of predicted  $\alpha$ -diversity decreases significantly in the downstream  
221 direction in spring and summer, while it increases non-significantly in autumn (Table 1, Fig. 2). Clusters of  
222 high invertebrate  $\alpha$ -diversity are predicted in the mid-Thur and Necker reaches, which is in qualitative  
223 agreement with the patterns found by Carraro et al. [2020b] for the orders Ephemeroptera, Plecoptera and  
224 Trichoptera in late June (note that, in the data set here analyzed, 29 invertebrate genera out of 80 belong

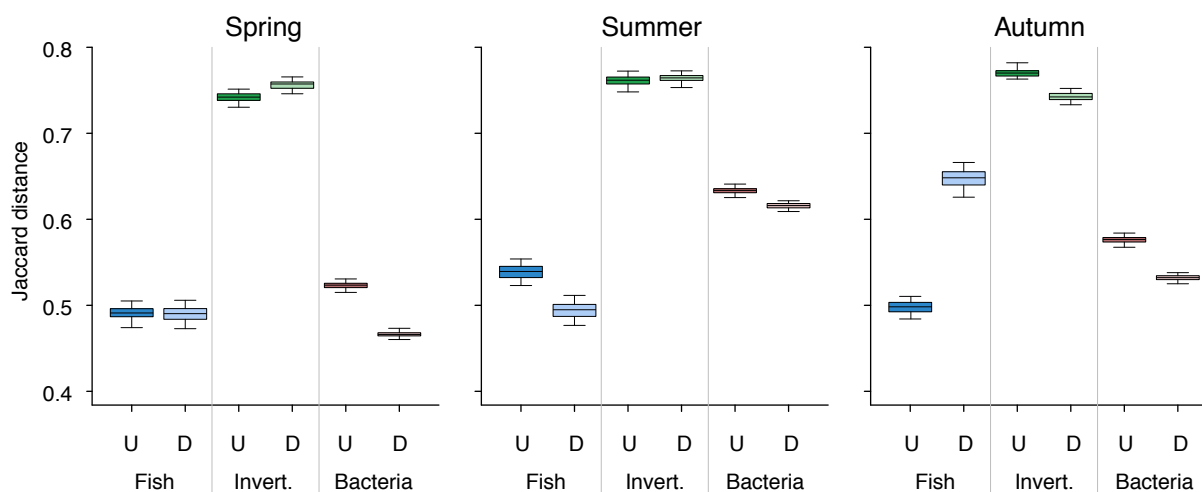

**Figure 4:** Effect of drainage area on predicted spatial  $\beta$ -diversity of fish, invertebrates ("Invert.") and bacteria, respectively. Each boxplot contains 100 values, representing the mean pairwise Jaccard distance for one of the 100 replicated choices of pairs within a group of reaches ("U": upstream; "D": downstream - see Methods). Boxes' extent corresponds to interquartile range; whiskers' extent to 2.5<sup>th</sup>-97.5<sup>th</sup> percentile range.

225 to one of these three orders). Invertebrate genus richness in autumn tends to be lower as compared to  
226 spring and summer (Figs. 2, 3). This finding is reflected by the sensibly lower number of reads observed  
227 in autumn for invertebrates as compared to the other seasons, although the total number of invertebrate  
228 genera detected in autumn (56) is comparable to that of spring (62) and summer (57) (see Fig. S1). Predicted  
229 bacteria  $\alpha$ -diversity shows a flat distribution across the catchment for all seasons, with a significant decrease  
230 in the downstream direction observed only in summer, while the effect of drainage area is not significant in  
231 spring and autumn. Summer values of bacterial  $\alpha$ -diversity are considerably lower with respect to spring  
232 and autumn (Figs. 2, 3).

233 Patterns of predicted  $\alpha$ -diversity for any taxonomic group are positively correlated across seasons,  
234 with spring-autumn correlations being higher than spring-summer correlations for all taxonomic groups  
235 (Fig. S3). Moreover, invertebrate  $\alpha$ -diversity is strongly correlated with bacteria  $\alpha$ -diversity at all seasons,  
236 suggesting a link between these contiguous trophic levels; fish  $\alpha$ -diversity also shows positive correlations  
237 with invertebrate  $\alpha$ -diversity for all seasons, although the effect is in this case less strong (Fig. S4).

### 238 3.2 $\beta$ -diversity patterns

239 The effect of drainage area on predicted spatial  $\beta$ -diversity patterns depends greatly on the taxonomic  
240 group and the season (Table 1, Fig. 4). For fish, spatial  $\beta$ -diversity decreases in the downstream direction in  
241 summer, while the pattern is reversed in autumn, and no effect of drainage area is observed in spring; for  
242 invertebrates, there is no significant trend of drainage area on spatial  $\beta$ -diversity in spring and summer,  
243 while a decreasing trend is observed in autumn; finally, spatial  $\beta$ -diversity of bacteria decreases significantly

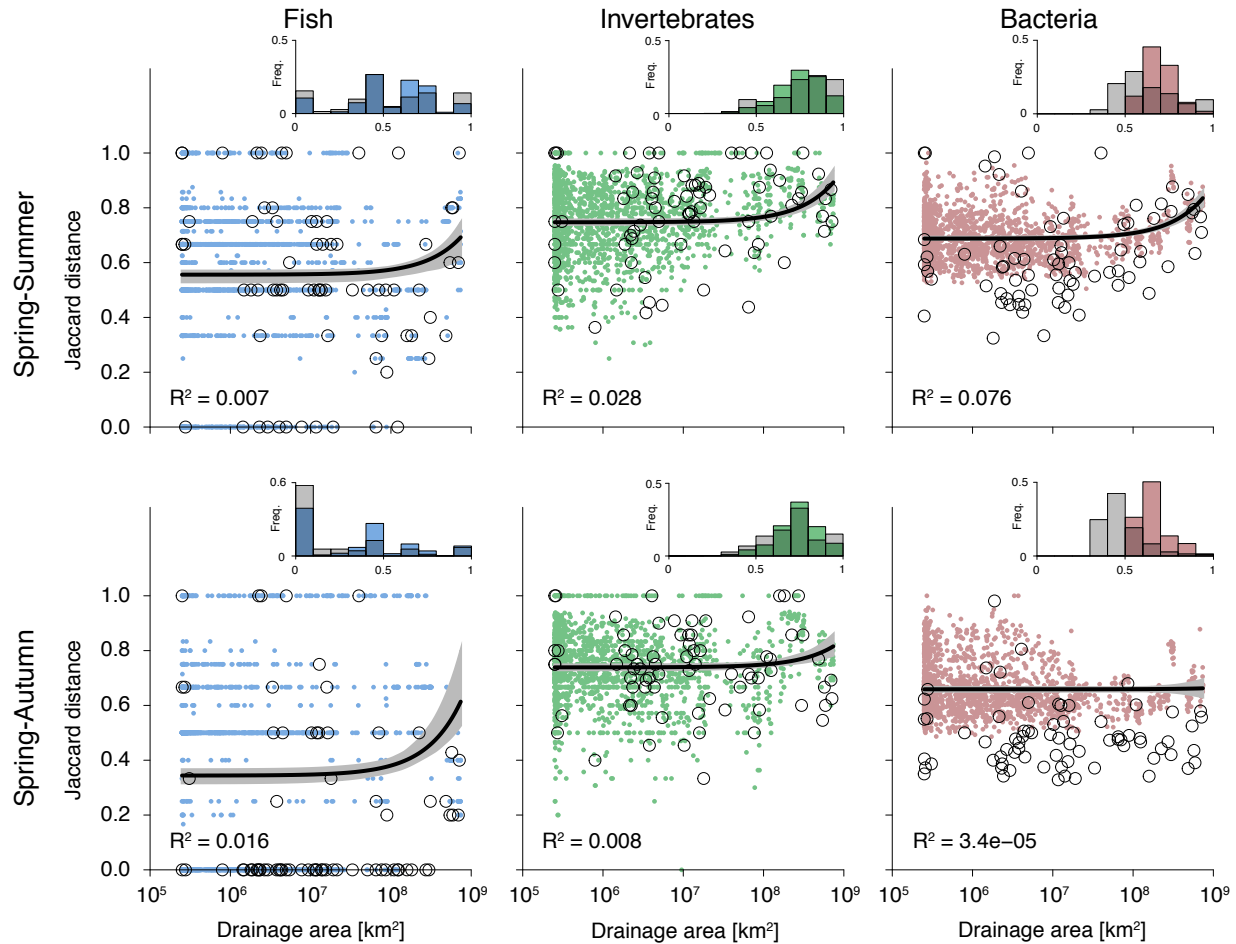

**Figure 5:** Patterns of predicted temporal  $\beta$ -diversity as a function of drainage area. Figure construction is as in Fig. 2.

244 with drainage area for all seasons. Importantly, across all seasons, values of the Jaccard distance for  
 245 invertebrates are much larger than those for fish and bacteria. Analysis of the relative contribution of  
 246 nestedness and turnover components to the total Jaccard distance shows the predominant role of turnover  
 247 in  $\beta$ -diversity for invertebrates and bacteria across all seasons, while a larger role of nestedness is observed  
 248 for fish (Table S1).

249 Patterns of predicted temporal  $\beta$ -diversity are significantly and positively related to drainage area  
 250 for all taxonomic groups and seasons, with the exception of bacteria in the spring-autumn comparison,  
 251 where the positive trend is not significant (Table 1, Fig. 5). However, the proportion of variance in Jaccard  
 252 distance explained by drainage area is low (i.e., consistently lower than 8%). Interestingly, for all taxonomic  
 253 groups, higher values of predicted temporal  $\beta$ -diversity are observed in the spring-summer, than in the  
 254 spring-autumn comparison (Table S2). This reflects the fact that patterns of spring  $\alpha$ -diversity are better  
 255 correlated to patterns of autumn, than summer  $\alpha$ -diversity (Fig. S3). Moreover, values of temporal  $\beta$ -

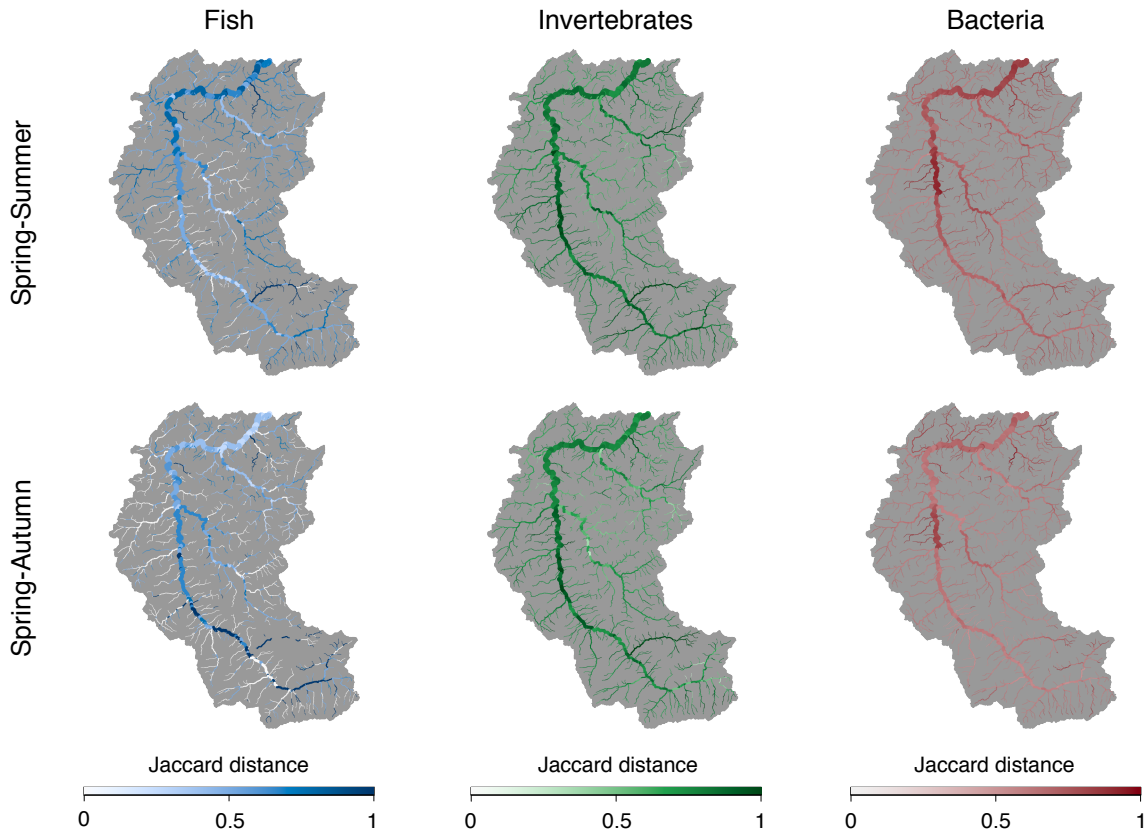

**Figure 6:** Spatial patterns of predicted temporal  $\beta$ -diversity (expressed via the Jaccard distance).

256 diversity for invertebrates are higher than those for fish and bacteria, thus showing that predicted patterns  
257 of invertebrate communities (or their detectability, see Discussion) are much more diverse in both spatial  
258 and temporal dimensions than other taxonomic groups. For fish, larger values of Jaccard distance in the  
259 spring-summer comparison are observed at the downstream reaches, while the highest temporal  $\beta$ -diversity  
260 is found at the mid-to-upper Thur reaches (Fig. 6). Regarding invertebrates, the predicted spatial trends of  
261 temporal  $\beta$ -diversity tend to be more constant across seasons, with larger values observed along the main  
262 Thur stem, and more stable communities in the Necker and Glatt tributaries (Fig. 6). Bacteria temporal  
263  $\beta$ -diversity shows a less pronounced spatial variability, with all values being larger than 0.4 at all seasons  
264 (Fig. 5). As it was the case for spatial  $\beta$ -diversity, temporal  $\beta$ -diversity of fish is mostly driven by nestedness,  
265 while turnover plays a major role in the temporal  $\beta$ -diversity of invertebrates and bacteria (Table S2). Finally,  
266 bacteria temporal  $\beta$ -diversity evaluated on the raw eDNA data is considerably lower with respect to that  
267 evaluated via the eDITH model (Fig. 5, insets). As for fish and invertebrates, differences between the two  
268 approaches are less marked, although data-based temporal  $\beta$ -diversity tends to assume more extreme (both  
269 low and high) values.

## 270 4 Discussion

271 The combined use of the eDITH model and a spatially and temporally replicated multimarker eDNA data  
272 set allowed the assessment of patterns of  $\alpha$ - and  $\beta$ -diversity across a river catchment with approximately a  
273 30-fold increased resolution compared to the initial sampling sites. Specifically, using data from 73 sampling  
274 sites across the whole catchment, diversity patterns across all taxonomic groups were extrapolated at a  
275 genus level to cover a total of 1908 river reaches (of mean length  $\sim$ 500 m) along the complete river network,  
276 giving unprecedented spatially covered information on fish, invertebrates and bacteria. Comparison of  
277 these  $\alpha$ - and temporal  $\beta$ -diversity patterns obtained via the eDITH model vs. the raw eDNA data revealed  
278 substantial differences between the two approaches for several taxonomic groups and seasons. As for  
279 spatial  $\beta$ -patterns, a proper comparison with the raw data could not even be done due to the (inevitably)  
280 limited number of eDNA sampling sites available. It is widely acknowledged that performing richness and  
281 diversity studies on raw eDNA data is problematic due to the large number of false negatives arising from  
282 the multiple steps of the metabarcoding procedure [Fukaya et al., 2022]. In eDITH, this aspect is accounted  
283 for via the assumption of geometric distribution of observed read number values for a given site and taxon.  
284 This allows detecting components of richness and diversity that would be otherwise overseen. Indeed, we  
285 found genus richness values estimated via eDITH to be often higher than those assessed from the raw data  
286 (Fig. 2).

287 Importantly, we found patterns of predicted  $\alpha$ - and  $\beta$ -diversity to be strongly dependent both on the  
288 taxonomic group and season, which is in contrast with the predictions of Vannote et al. [1980] and Finn  
289 et al. [2011] of seasonally invariant and increasing  $\alpha$ -diversity and decreasing  $\beta$ -diversity in the downstream  
290 direction, respectively. The only taxonomic groups for which patterns were found to be in accordance with  
291 these predictions are fish for  $\alpha$ -diversity and bacteria for  $\beta$ -diversity. Overall, however, drainage area was  
292 found to be a poor (and often even non-significant) predictor of patterns of both diversity types. Indeed,  
293 occurrence of genera resulted to be correlated to a variety of environmental covariates, with considerable  
294 variation in importance and direction of the effect across seasons and taxonomic groups (see Fig. S2). On  
295 the same data set, Blackman et al. [2021a] assessed effect of drainage area and season on genus richness via  
296 mixed models (applied on the raw eDNA data), finding a positive, significant effect of drainage area for  
297 fish, and a significant effect for bacteria whose direction depended on the season. Our modelling approach  
298 came to a similar conclusion with respect to these groups, but additional negative, significant effects of  
299 drainage area for invertebrates in spring and summer were observed (Table 1).

300 Predicted patterns of invertebrates were found to be highly variant in both space and time, as spatial  
301 and temporal  $\beta$ -diversity values were the highest with respect to other taxonomic groups (Figs. 4, 5,  
302 Tables S1, S2). Indeed, most invertebrate genera were predicted to be located only in limited parts of the  
303 catchment and showed a marked temporal variability. Only 2.5% of the invertebrate genera (i.e., 2 out of

304 80, *Baetis* and *Eiseniella*) were predicted to be present in at least 25% of the same reaches across the three  
305 seasons (Fig. S5). In contrast, bacteria communities showed lower variability in both space and time, with  
306 a core group of genera that were found to be present in large portions of the catchment irrespective of  
307 the season: 9.6% of the detected genera (i.e. 27 out of 282) occupied at least 25% of the same reaches at  
308 all seasons (Fig. S5). Plausible explanations for limited variability in bacteria patterns are their limited  
309 dispersal abilities, and the fact that bacteria genera generally consist of a higher number of species than is  
310 the case for the other taxonomic groups, hence possible turnover at the species level is here hidden. Higher  
311 variability of invertebrate patterns as compared to bacteria is also supported by the fact that predicted  
312 invertebrate richness in spring explains less variation in richness in the other seasons as compared to  
313 bacteria (and partially to fish, see Fig. S4). Fish were found to be the most stable taxonomic group, with  
314 temporal  $\beta$ -diversity values much lower than those for invertebrates and bacteria (Fig. 5, Table S2), and  
315 spatial values lower than those for invertebrates and comparable to those for bacteria (Fig. 4, Table S1). This  
316 result is likely influenced by the limited number (12) of fish genera detected, and the ubiquity of the genus  
317 *Salmo*, which was predicted to be present in > 80% of the same reaches across the three seasons (Figs. S5,  
318 S6).

319 Overall, we see two main mutually non-exclusive explanations for these patterns and their limited  
320 overlap with previous models and findings [Vannote et al., 1980; Finn et al., 2011]. First, past predictions of  
321 riverine diversity patterns were often based on a small number of sites, often situated in a linear line-up  
322 along the main river stem. Thereby, these studies did not consider contributions of small-scale spatial  
323 dynamics from the dendritic river network, nor temporally fluctuating dynamics in organisms' abundance  
324 and occurrence. Such time-invariant assumptions may be adequate for some groups, yet are likely not  
325 realistic for systems with a pronounced seasonality, including alternation between high and low flows  
326 or even desiccation, resulting in complex population dynamics. Second, our approach assumes an even  
327 detectability across space for the taxa considered. Likely, this strong assumption is at least to some degree  
328 violated, as eDNA-based data are known to be highly affected by stochasticity [Deagle et al., 2014; Elbrecht  
329 and Leese, 2015; Kelly et al., 2019] or may not be totally replicable, especially with generic primers as used  
330 here. Thus, some of the observed patterns may also reflect heterogeneity in the sampling procedure itself.  
331 While we cannot separate these processes, we are confident that the latter (uneven detectability) does not  
332 play a dominant role. Note also that possible temporal differences in detectability have been accounted for  
333 by the modeling procedure, since taxon distribution patterns were obtained separately for each season,  
334 and by using time-specific values for the hydrological variables. Therefore, despite eDNA shedding rates  
335 being dependent on environmental factors such as water temperature and metabolic activity [Jo et al., 2019;  
336 Thalinger et al., 2021] and hence arguably on season, these aspects do not affect our predictions.

337 In particular, seasonal differences in diversity patterns could be related to biological (when taxa actually

338 change their abundance and/or spatial distribution across seasons) or methodological (when the likelihood  
339 to detect taxa changes across seasons) aspects. In the latter case, absence data may not be indicative of  
340 a true absence, but may be interpreted as an “ecological absence” (i.e. not ecologically relevant at that  
341 time point due to low density [Blackman et al., 2021a]). In our results, several observed patterns have  
342 a plausible biological explanation. First, the higher  $\alpha$ -diversity of fish in low size reaches in summer as  
343 compared to the other seasons (Fig. 3) is possibly due to the migrating behaviour of several fish taxa  
344 during the spawning season, which, for widely found species in European temperate rivers, such as the  
345 gudgeon (*Gobio gobio*) and the common minnow (*Phoxinus phoxinus*), happens in late spring and early summer  
346 (see the predicted presence/absence maps for genera *Gobio* and *Phoxinus* in Fig. S6). Second, the lower  
347  $\alpha$ -diversity of invertebrates in autumn (Fig. 3) is likely related to the fact that many aquatic insects have  
348 already completed the aquatic part of their life cycle in autumn. Instead, the observed lower bacteria  
349 richness in summer compared to spring and autumn could have a methodological explanation: indeed,  
350 the total number of reads observed for bacteria in summer is intermediate with respect to those for spring  
351 and autumn, resulting however in a lower number of detected genera (198) with respect to spring (220)  
352 and autumn (214) (Fig. S1). This apparent mismatch between read number count and number of detected  
353 genera could be explained by the proliferation of some bacterial taxa in summer following temperature  
354 increase, which could mask the DNA from rarer taxa in the sequencing procedure, such that most (or all)  
355 amplification is biased towards the dominant taxa. Such patterns, similarly to primer bias, are well-known  
356 in metabarcoding studies [Kelly et al., 2019], and we acknowledge that the relatively low volume of water  
357 sampled may not have resulted in sufficiently saturated species accumulation curves.

358 The use of the eDITH model allowed an enhancement of our capability of interpreting eDNA data,  
359 enabling the extraction of patterns of  $\alpha$ - and  $\beta$ -diversity at a much higher spatial resolution than what  
360 could be achieved by analyzing the eDNA data alone. Indeed, the spatial resolution at which model  
361 predictions are produced can be tuned freely, and this choice does not add any complexity to the model  
362 fitting procedure, as long as eDNA production rates  $p_i$  are expressed as a function of environmental  
363 covariates. In this application, we imposed a maximum reach length of 1 km, which resulted in a total  
364 of 1908 reaches, more than double than the number of reaches (760) used in a previous application in  
365 the same catchment [Carraro et al., 2020b]. However, it is important to note that a finer discretization of  
366 the river network would result in predicted richness values at the different reaches that would be more  
367 interdependent, which would require adequate tools (such as the ad-hoc statistical tests performed here)  
368 to analyze the resulting patterns. Another caveat in this respect, pointing at an opposite direction, is  
369 that too fine of a discretization might result in unrealistic small-scale differences in taxon patterns (e.g.,  
370 presence-absence-presence predicted at a sequence of short, flow-connected reaches); a potential solution is  
371 offered by roughness-minimizing approaches borrowed by fluvial geochemistry in the analogous problem



372 of predicting geochemical maps in catchments based on downstream water samples [Lipp et al., 2021].

373 In the present analysis, we used drainage area as the variable defining the spatial position of local  
374 communities (reaches) in the river network. Drainage area is the master variable controlling the bulk  
375 of hydrological and geomorphological features that shape a fluvial landscape (such as water discharge,  
376 velocity, river width and depth [Rodriguez-Iturbe and Rinaldo, 2001]) but also organic matter and nutrient  
377 availability [Bertuzzo et al., 2017; Helton et al., 2018; Jacquet et al., 2021], and hence also determine local  
378 habitat conditions. Thus, its use is, both from a hydrological as well as ecological perspective, highly  
379 suitable. Importantly, however, increasing  $\alpha$ - and decreasing  $\beta$ -diversity patterns in river networks had  
380 previously been described mostly with respect to stream order [Vannote et al., 1980; Finn et al., 2011;  
381 Altermatt, 2013]; our choice of using drainage area is consistent with previous studies, as this variable  
382 varies predictably with stream order according to Horton's law on drainage areas [Schumm, 1956]. It is  
383 likely, however, that our approach might have an impact on estimation of trends of spatial  $\beta$ -diversity.  
384 The partitioning of reaches into an "upstream" and a "downstream" group was roughly equivalent to  
385 comparing headwaters (i.e., reaches with stream order equal to 1) to all other reaches (Fig. S7). While  
386 pairwise Jaccard distances for reaches of stream order 4 or 5 could be lower with respect to those for more  
387 upstream reaches, it is unfeasible to statistically assess the magnitude of this trend for the different stream  
388 order values, because of the paucity of reaches with stream order  $\geq 4$  in the river network, and the fact that  
389 these tend to be connected by flow (which is likely to bias conclusions on  $\beta$ -diversity, see Methods). Note  
390 also that the predominance of headwaters with respect to reaches of high stream order is not limited to the  
391 catchment studied here, but is rather a universal feature of river networks [Horton, 1945].

392 We acknowledge that the herein assessed riverine biodiversity patterns do not cover sampling variability  
393 at the site level; it is indeed known that read number values vary substantially as a result of stochasticity  
394 in the sequencing process [Deagle et al., 2014; Deiner et al., 2015; Elbrecht and Leese, 2015], and thus our  
395 results contain some level of stochastic variation that we cannot control for. Higher robustness of eDITH  
396 predictions would be possible by incorporating true sampling replicates of the eDNA water samples, upon  
397 which the model fitting procedure is applied. Moreover, the predicted biodiversity patterns could be  
398 validated by comparing them with abundance estimates from direct observation of organisms. While this  
399 is feasible for fish (e.g. via electrofishing) and invertebrate (via kicknet sampling) groups, validation of  
400 bacterial patterns would be more complicated, as it would rely again on metabarcoding approaches from  
401 different supports (e.g. biofilm, although free floating bacteria communities can arguably not fully overlap  
402 with communities growing in benthic biofilm). In this respect, a possible improvement of the eDITH model  
403 would consist in the merging of eDNA and direct organismal observation data via joint-likelihood data  
404 integration methods [Miller et al., 2019]. Another conceivable expansion of the current analysis regards  
405 the use of taxon richness predictions provided by eDITH to foster food web analysis at an unprecedented

406 spatial resolution (see Blackman et al. [2021a] for assessment of food web characteristic and functional  
407 diversity based on the raw eDNA data). This analysis seems particularly promising in the case study at  
408 hand, given the clear link that we observed between richness patterns of contiguous trophic level (Fig. S3).

409 In conclusion, the eDITH approach, which transforms eDNA data into space-filling predictions of  
410 biodiversity, is generally applicable to any taxonomic group in riverine ecosystems and any temporal  
411 window, providing biodiversity predictions that can be used in the analysis of ecosystem processes, as well  
412 as to implement targeted (both spatially and temporally) conservation interventions. Predicted patterns of  
413  $\alpha$ - and  $\beta$ -diversity across taxonomic groups and seasons were not generally amenable to a simple increasing  
414 or decreasing trend in the downstream direction, but rather to a complex interplay of environmental  
415 variables, abiotic and biotic factors, highlighting the need for differentiated conservation approaches in  
416 riverine systems. A thorough assessment of biological communities in rivers cannot forego the integration  
417 of these aspects, and the eDITH model can be an adequate tool for such integrated analyses.

## 418 **5 Acknowledgements**

419 We thank Samuel Hürlemann, Xing Xing, Silvana Kaeser, Elvira Mächler, Roman Alther, Silvia Kobel  
420 and Aria Minder for help during field and laboratory work. Data were generated in collaboration with  
421 Jean-Claude Walser and the Genetic Diversity Centre (<https://gdc.ethz.ch>), ETH Zurich, Switzerland.  
422 Funding is from the Swiss National Science Foundation Grants No 31003A\_173074 and PP00P3\_179089 (to  
423 FA) and the University of Zurich Research Priority Programme on Global Change and Biodiversity (URPP  
424 GCB, to FA).

## 425 **References**

- 426 Abbaspour, K. C., Yang, J., Maximov, I., Siber, R., Bogner, K., Mieleitner, J., Zobrist, J., and Srinivasan, R.  
427 (2007). Modelling hydrology and water quality in the pre-alpine/alpine Thur watershed using SWAT.  
428 *Journal of Hydrology*, 333(2-4):413–430.
- 429 Altermatt, F. (2013). Diversity in riverine metacommunities: a network perspective. *Aquatic Ecology*,  
430 47(3):365–377.
- 431 Altermatt, F., Little, C. J., Mächler, E., Wang, S., Zhang, X., and Blackman, R. C. (2020). Uncovering the  
432 complete biodiversity structure in spatial networks: the example of riverine systems. *Oikos*, 129(5):607–618.
- 433 Altermatt, F., Seymour, M., and Martinez, N. (2013). River network properties shape  $\alpha$ -diversity and  
434 community similarity patterns of aquatic insect communities across major drainage basins. *Journal of*  
435 *Biogeography*, 40(12):2249–2260.
- 436 Barbour, M. T. (1999). *Rapid bioassessment protocols for use in wadeable streams and rivers: periphyton, benthic*  
437 *macroinvertebrates and fish*. US Environmental Protection Agency, Office of Water.
- 438 Barnes, M. A. and Turner, C. R. (2015). The ecology of environmental DNA and implications for conservation  
439 genetics. *Conservation Genetics*, 17(1):1–17.
- 440 Baselga, A. and Orme, C. D. L. (2012). betapart: an R package for the study of beta diversity. *Methods in*  
441 *Ecology and Evolution*, 3(5):808–812.
- 442 Beng, K. C. and Corlett, R. T. (2020). Applications of environmental DNA (eDNA) in ecology and  
443 conservation: opportunities, challenges and prospects. *Biodiversity and Conservation*, 29(7):2089–2121.
- 444 Bertuzzo, E., Helton, A. M., Hall, R. O., J., and Battin, T. J. (2017). Scaling of dissolved organic carbon  
445 removal in river networks. *Advances in Water Resources*, 110:136–146.
- 446 Besemer, K., Singer, G., Quince, C., Bertuzzo, E., Sloan, W., and Battin, T. J. (2013). Headwaters are critical  
447 reservoirs of microbial diversity for fluvial networks. *Proceedings of the Royal Society B: Biological Sciences*,  
448 280(1771).
- 449 Blackman, R. C., Ho, H.-C., Walser, J.-C., and Altermatt, F. (2021a). Spatio-temporal patterns of multi-trophic  
450 biodiversity and food-web characteristics across a river catchment. *bioRxiv*. doi:10.1101/2021.07.20.450136.
- 451 Blackman, R. C., Osathanunkul, M., Brantschen, J., Di Muri, C., Harper, L. R., Mächler, E., Hänfling, B., and  
452 Altermatt, F. (2021b). Mapping biodiversity hotspots of fish communities in subtropical streams through  
453 environmental DNA. *Scientific Reports*, 11(1).

- 454 Carraro, L., Bertuzzo, E., Fronhofer, E. A., Furrer, R., Gounand, I., Rinaldo, A., and Altermatt, F. (2020a).  
455 Generation and application of river network analogues for use in ecology and evolution. *Ecology and*  
456 *Evolution*, 10(14):7537–7550.
- 457 Carraro, L., Bertuzzo, E., Mari, L., Fontes, I., Hartikainen, H., Strepparava, N., Schmidt-Posthaus, H., Wahli,  
458 T., Jokela, J., Gatto, M., and Rinaldo, A. (2017). Integrated field, laboratory, and theoretical study of PKD  
459 spread in a Swiss prealpine river. *Proceedings of the National Academy of Sciences of the United States of*  
460 *America*, 114(45):11992–11997.
- 461 Carraro, L., Hartikainen, H., Jokela, J., Bertuzzo, E., and Rinaldo, A. (2018). Estimating species distribution  
462 and abundance in river networks using environmental DNA. *Proceedings of the National Academy of*  
463 *Sciences of the United States of America*, 115(46):11724–11729.
- 464 Carraro, L., Mächler, E., Wüthrich, R., and Altermatt, F. (2020b). Environmental DNA allows upscaling  
465 spatial patterns of biodiversity in freshwater ecosystems. *Nature Communications*, 11(1):3585.
- 466 Carraro, L., Stauffer, J. B., and Altermatt, F. (2021). How to design optimal eDNA sampling strategies for  
467 biomonitoring in river networks. *Environmental DNA*, 3(1):157–172.
- 468 Darwall, W., Bremerich, V., De Wever, A., Dell, A. I., Freyhof, J., Gessner, M. O., Grossart, H. ., Harrison,  
469 I., Irvine, K., Jähnig, S. C., Jeschke, J. M., Lee, J. J., Lu, C., Lewandowska, A. M., Monaghan, M. T.,  
470 Nejstgaard, J. C., Patricio, H., Schmidt-Kloiber, A., Stuart, S. N., Thieme, M., Tockner, K., Turak, E., and  
471 Weyl, O. (2018). The alliance for freshwater life: A global call to unite efforts for freshwater biodiversity  
472 science and conservation. *Aquatic Conservation: Marine and Freshwater Ecosystems*, 28(4):1015–1022.
- 473 Darwall, W. R. T., Holland, R. A., Smith, K. G., Allen, D., Brooks, E. G. E., Katarya, V., Pollock, C. M., Shi,  
474 Y., Clausnitzer, V., Cumberlidge, N., Cuttelod, A., Dijkstra, K. . B., Diop, M. D., García, N., Seddon, M. B.,  
475 Skelton, P. H., Snoeks, J., Tweddle, D., and Vié, J. (2011). Implications of bias in conservation research  
476 and investment for freshwater species. *Conservation Letters*, 4(6):474–482.
- 477 Deagle, B. E., Jarman, S. N., Coissac, E., Pompanon, F., and Taberlet, P. (2014). DNA metabarcoding and the  
478 cytochrome *c* oxidase subunit I marker: not a perfect match. *Biology Letters*, 10(9):20140562.
- 479 Deiner, K. and Altermatt, F. (2014). Transport distance of invertebrate environmental DNA in a natural  
480 river. *PLoS One*, 9(2):e88786.
- 481 Deiner, K., Bik, H. M., Mächler, E., Seymour, M., Lacoursière-Roussel, A., Altermatt, F., Creer, S., Bista, I.,  
482 Lodge, D. M., Vere, N., Pfrender, M. E., and Bernatchez, L. (2017). Environmental DNA metabarcoding:  
483 Transforming how we survey animal and plant communities. *Molecular Ecology*, 26(21):5872–5895.

- 484 Deiner, K., Fronhofer, E. A., Mächler, E., Walser, J.-C., and Altermatt, F. (2016). Environmental DNA reveals  
485 that rivers are conveyor belts of biodiversity information. *Nature Communications*, 7(1):12544.
- 486 Deiner, K., Walser, J.-C., Mächler, E., and Altermatt, F. (2015). Choice of capture and extraction methods  
487 affect detection of freshwater biodiversity from environmental DNA. *Biological Conservation*, 183:53–63.
- 488 Dudgeon, D. (2020). *Freshwater Biodiversity*. Cambridge University Press.
- 489 Elbrecht, V. and Leese, F. (2015). Can DNA-based ecosystem assessments quantify species abundance?  
490 testing primer bias and biomass—sequence relationships with an innovative metabarcoding protocol.  
491 *PloS One*, 10(7):e0130324.
- 492 Finn, D. S., Bonada, N., Múrria, C., and Hughes, J. M. (2011). Small but mighty: headwaters are vital to  
493 stream network biodiversity at two levels of organization. *Journal of the North American Benthological*  
494 *Society*, 30(4):963 – 980.
- 495 Fukaya, K., Kondo, N. I., Matsuzaki, S.-i. S., and Kadoya, T. (2022). Multispecies site occupancy modelling  
496 and study design for spatially replicated environmental DNA metabarcoding. *Methods in Ecology and*  
497 *Evolution*, 13(1):183–193.
- 498 Hartig, F., Minunno, F., and Paul, S. (2019). *BayesianTools: General-Purpose MCMC and SMC Samplers and*  
499 *Tools for Bayesian Statistics*. R package version 0.1.7.
- 500 Helton, A. M., Hall Jr, R. O., and Bertuzzo, E. (2018). How network structure can affect nitrogen removal by  
501 streams. *Freshwater Biology*, 63(1):128–140.
- 502 Horton, R. E. (1945). Erosional development of streams and their drainage basins; hydrophysical approach  
503 to quantitative morphology. *Geological society of America bulletin*, 56(3):275–370.
- 504 Jacquet, C., Carraro, L., and Altermatt, F. (2021). Meta-ecosystem dynamics drive the spatial distribution of  
505 functional groups in river networks. *bioRxiv*. doi:10.1101/2021.06.04.447105.
- 506 Jo, T., Murakami, H., Yamamoto, S., Masuda, R., and Minamoto, T. (2019). Effect of water temperature and  
507 fish biomass on environmental DNA shedding, degradation, and size distribution. *Ecology and Evolution*,  
508 9(3):1135–1146.
- 509 Kelly, R. P., Shelton, A. O., and Gallego, R. (2019). Understanding PCR processes to draw meaningful  
510 conclusions from environmental DNA studies. *Scientific Reports*, 9(1):1–14.
- 511 Lipp, A. G., Roberts, G. G., Whittaker, A. C., Gowing, C. J. B., and Fernandes, V. M. (2021). Source region  
512 geochemistry from unmixing downstream sedimentary elemental compositions. *Geochemistry, Geophysics,*  
513 *Geosystems*, 22(10):e2021GC009838.

- 514 Miller, D. A. W., Pacifici, K., Sanderlin, J. S., and Reich, B. J. (2019). The recent past and promising future for  
515 data integration methods to estimate species' distributions. *Methods in Ecology and Evolution*, 10(1):22–37.
- 516 Muneeppeerakul, R., Bertuzzo, E., Lynch, H. J., Fagan, W. F., Rinaldo, A., and Rodriguez-Iturbe, I. (2008).  
517 Neutral metacommunity models predict fish diversity patterns in mississippi-missouri basin. *Nature*,  
518 453(7192):220–222.
- 519 Mächler, E., Little, C. J., Wüthrich, R., Alther, R., Fronhofer, E. A., Gounand, I., Harvey, E., Hürlemann, S.,  
520 Walser, J.-C., and Altermatt, F. (2019). Assessing different components of diversity across a river network  
521 using eDNA. *Environmental DNA*, 1(3):290–301.
- 522 O'Callaghan, J. F. and Mark, D. M. (1984). The extraction of drainage networks from digital elevation data.  
523 *Computer Vision, Graphics, and Image Processing*, 28(3):323–344.
- 524 Pawlowski, J., Apothéloz-Perret-Gentil, L., and Altermatt, F. (2020). Environmental DNA: What's behind  
525 the term? clarifying the terminology and recommendations for its future use in biomonitoring. *Molecular*  
526 *Ecology*, 29(22):4258–4264.
- 527 Reid, A. J., Carlson, A. K., Creed, I. F., Eliason, E. J., Gell, P. A., Johnson, P. T. J., Kidd, K. A., MacCormack,  
528 T. J., Olden, J. D., Ormerod, S. J., Smol, J. P., Taylor, W. W., Tockner, K., Vermaire, J. C., Dudgeon, D., and  
529 Cooke, S. J. (2019). Emerging threats and persistent conservation challenges for freshwater biodiversity.  
530 *Biological Reviews*, 94(3):849–873.
- 531 Rodriguez-Iturbe, I. and Rinaldo, A. (2001). *Fractal River Basins. Chance and self-organization*. Cambridge  
532 University Press, New York, US.
- 533 Ruiz-González, C., Niño-García, J. P., and del Giorgio, P. A. (2015). Terrestrial origin of bacterial communities  
534 in complex boreal freshwater networks. *Ecology Letters*, 18(11):1198–1206.
- 535 Savio, D., Sinclair, L., Ijaz, U. Z., Parajka, J., Reischer, G. H., Stadler, P., Blaschke, A. P., Blöschl, G., Mach,  
536 R. L., Kirschner, A. K., et al. (2015). Bacterial diversity along a 2600 km river continuum. *Environmental*  
537 *Microbiology*, 17(12):4994–5007.
- 538 Schumm, S. A. (1956). Evolution of drainage systems and slopes in badlands at Perth Amboy, New Jersey.  
539 *Geological Society of America Bulletin*, 67(5):597–646.
- 540 Seymour, M., Edwards, F. K., Cosby, B. J., Bista, I., Scarlett, P. M., Brailsford, F. L., Glanville, H. C., de Bruyn,  
541 M., Carvalho, G. R., and Creer, S. (2021). Environmental DNA provides higher resolution assessment of  
542 riverine biodiversity and ecosystem function via spatio-temporal nestedness and turnover partitioning.  
543 *Communications Biology*, 4(1):1–12.

- 544 Shogren, A. J., Tank, J. L., Andruszkiewicz, E., Olds, B., Mahon, A. R., Jerde, C. L., and Bolster, D. (2017).  
545 Controls on eDNA movement in streams: Transport, Retention, and Resuspension. *Scientific Reports*,  
546 7(1):5065.
- 547 Taberlet, P., Coissac, E., Hajibabaei, M., and Rieseberg, L. H. (2012). Environmental DNA. *Molecular Ecology*,  
548 21(8):1789–1793.
- 549 Thalinger, B., Rieder, A., Teuffenbach, A., Pütz, Y., Schwerte, T., Wanzenböck, J., and Traugott, M. (2021).  
550 The effect of activity, energy use, and species identity on environmental DNA shedding of freshwater  
551 fish. *Frontiers in Ecology and Evolution*, 9:73.
- 552 Thomsen, P. F. and Willerslev, E. (2015). Environmental DNA - An emerging tool in conservation for  
553 monitoring past and present biodiversity. *Biological Conservation*, 183:4–18.
- 554 Tonkin, J. D., Sundermann, A., Jähnig, S. C., and Haase, P. (2015). Environmental controls on river  
555 assemblages at the regional scale: an application of the elements of metacommunity structure framework.  
556 *PLoS One*, 10(8):e0135450.
- 557 Valentini, A., Taberlet, P., Miaud, C., Civade, R., Herder, J., Thomsen, P. F., Bellemain, E., Besnard, A.,  
558 Coissac, E., Boyer, F., Gaboriaud, C., Jean, P., Poulet, N., Roset, N., Copp, G. H., Geniez, P., Pont, D.,  
559 Argillier, C., Baudoin, J. ., Peroux, T., Crivelli, A. J., Olivier, A., Acqueberge, M., Le Brun, M., Møller,  
560 P. R., Willerslev, E., and Dejean, T. (2016). Next-generation monitoring of aquatic biodiversity using  
561 environmental DNA metabarcoding. *Molecular Ecology*, 25(4):929–942.
- 562 Vander Vorste, R., McElmurray, P., Bell, S., Eliason, K. M., and Brown, B. L. (2017). Does stream size really  
563 explain biodiversity patterns in lotic systems? A call for mechanistic explanations. *Diversity*, 9(3).
- 564 Vannote, R. L., Minshall, G. W., Cummins, K. W., Sedell, J. R., and Cushing, C. E. (1980). The river  
565 continuum concept. *Canadian Journal of Fisheries and Aquatic Sciences*, 37(1):130–137.
- 566 Vörösmarty, C. J., McIntyre, P. B., Gessner, M. O., Dudgeon, D., Prusevich, A., Green, P., Glidden, S., Bunn,  
567 S. E., Sullivan, C. A., Liermann, C. R., and Davies, P. M. (2010). Global threats to human water security  
568 and river biodiversity. *Nature*, 467(7315):555–561.
- 569 Vrugt, J. A., Ter Braak, C. J. F., Diks, C. G. H., Robinson, B. A., Hyman, J. M., and Higdon, D. (2009). Accel-  
570 erating Markov chain Monte Carlo simulation by differential evolution with self-adaptive randomized  
571 subspace sampling. *International Journal of Nonlinear Sciences and Numerical Simulation*, 10(3):273–290.
- 572 Ward, J. (1998). Riverine landscapes: biodiversity patterns, disturbance regimes, and aquatic conservation.  
573 *Biological Conservation*, 83(3):269–278.
